# Supplementary material for: Integrated Metabolomics Approach Reveals the Dynamic Variations of Metabolites and Bioactivities in Paeonia ostii ‘Feng Dan’ Leaves during Development
Source: MDPI journal article supplement (doi:10.3390/ijms25021059), 2024-01-15
Supplement: s1 [file s1]

Table S1. Sampling dates and corresponding important phenology of *P. ostii* ‘Feng Dan’ leaves during development.

| Code | Date       | Phenology                  | Code | Date        | Phenology                   |
|------|------------|----------------------------|------|-------------|-----------------------------|
| S1   | March 7th  | bud lifting                | S10  | June 8th    | seed nutrient accumulation  |
| S2   | March 17th | wind bell-like flower bud  | S11  | June 19th   | seed nutrient accumulation  |
| S3   | March 27th | flat peach-like flower bud | S12  | June 29th   | seed nutrient accumulation  |
| S4   | April 7th  | flower blooming            | S13  | July 8th    | seed nutrient accumulation  |
| S5   | April 18th | flower failure             | S14  | July 19th   | seed coloring               |
| S6   | April 28th | seed expansion             | S15  | July 29th   | seed maturity               |
| S7   | May 9th    | seed expansion             | S16  | August 10th | seed abscission             |
| S8   | May 18th   | seed expansion             | S17  | August 18th | leaves began to turn yellow |
| S9   | May 28th   | seed expansion             |      |             |                             |

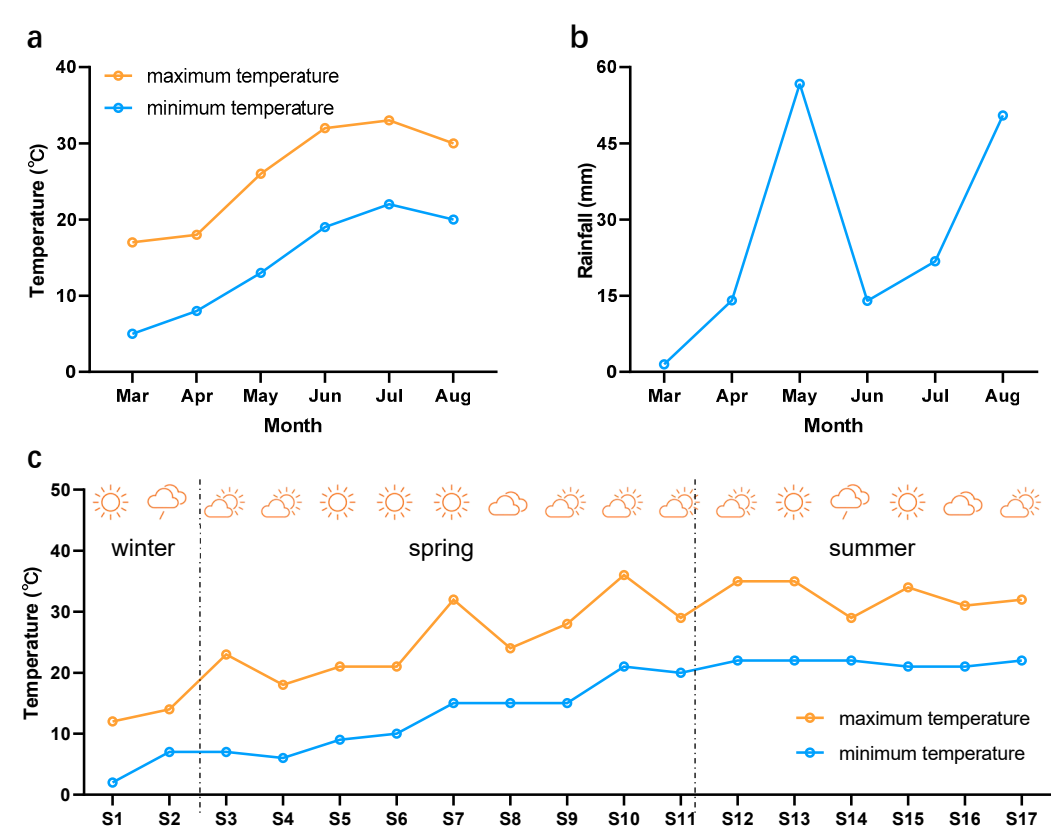

Figure S1. Environmental factors of *P. ostii* ‘Feng Dan’ leaves during developmental stages.
