# Supplementary material for: Integrated Metabolomics Approach Reveals the Dynamic Variations of Metabolites and Bioactivities in Paeonia ostii ‘Feng Dan’ Leaves during Development
Source: Int J Mol Sci. 2024 Jan 15;25(2):1059. doi: 10.3390/ijms25021059 (PMC10816844; doi:10.3390/ijms25021059)
Supplement: Supplementary file 1 [file ijms-25-01059-s001.zip]

Archive with 4 entries (4 files):
- supplementary material 1.pdf
- supplementary material 2.xlsx
- supplementary material 3.xlsx
- supplementary material 4.xlsx
