# Supplementary material for: Integrated Metabolomics Approach Reveals the Dynamic Variations of Metabolites and Bioactivities in Paeonia ostii ‘Feng Dan’ Leaves during Development
Source: Int J Mol Sci. 2024 Jan 15;25(2):1059. doi: 10.3390/ijms25021059 (PMC10816844; doi:10.3390/ijms25021059)
Supplement: Supplementary file 1 [file ijms-25-01059-s001.zip › supplementary material 2.xlsx]

## Sheet: Sheet1
Table S2 Identified metabolites of P. ostii ‘Feng Dan’ leaves.
NO.	RT	Compound	Fomula	Class	[M-H]-			[M+FA-H]-	[M-2H]-	[2M-H]-	[M+Cl]-	Major fragments
					Found m/z	Expected m/z	Error (ppm)	Found m/z	Found m/z	Found m/z	Found m/z
1	0.61	Glutamine	C5H10N2O3	Amino acids	145.062	145.061	0.275745					127, 109, 86, 84, 74, 58
2	0.61	PubChem CID 56776273	C21H28O13	Phenols	487.178	487.145	6.63047					307, 187, 163, 145, 117, 113, 101
3	0.63	Gluconic acid	C6H12O7	Carboxylic Acids	195.051	195.05	0.358881					159, 129, 112, 99, 87, 75, 59
4	0.64	PubChem CID 23902325	C20H19NO5	Others	352.091	352.118	-7.75307					353, 351, 238, 200, 182, 118, 96
5	0.64	Coumaroyl + C6H9O8	C15H16O10	Phenols	355.088	355.067	6.0552					209, 192, 191, 147, 129, 119, 86, 85
6	0.66	Sachaliside	C15H20O7	Phenols	311.098	311.113	-4.78926					311, 151, 101, 71, 59
7	0.66	Raffinose or isomer	C18H32O16	Carbohydrates	503.161	503.161	0.0397487					341, 281, 179, 149, 119, 89, 71, 59
8	0.67	Quinic acid	C7H12O6	Carboxylic Acids	191.056	191.055	0.471068					173, 171, 127, 111, 85, 59
9	0.67	Raffinose or isomer	C18H32O16	Carbohydrates							539.138	341, 323, 221, 179, 161
10	0.68	Carbamoylaspartate	C5H8N2O5	Amino acids	175.025	175.036	-6.22731					156, 138, 132, 115, 88
11	0.68	Salidroside or isomer	C14H20O7	Carbohydrates	299.099	299.113	-4.84766					179, 137, 119, 113, 101, 89, 71, 59
12	0.68	Glucogallin or isomer	C13H16O10	Tannins	331.067	331.067	0.0906162					271, 241, 211, 169, 151, 125
13	0.68	Palatinose	C12H22O11	Carbohydrates							377.085	221, 179,101, 89, 71
14	0.68	Methoxy-myricetin-3-O-hexoside	C22H22O13	Flavonoids	493.12	493.098	4.36019					331, 330, 317, 287, 271, 178
15	0.69	Glucose-1-phosphate	C6H13O9P	Carbohydrates	259.022	259.022	0.154427					241, 199, 169, 138, 97
16	0.69	PubChem CID 14334872	C26H28O14	Flavonoids	563.146	563.14	0.994424					417, 285, 284, 283, 256, 255, 159
17	0.69	Myricetin 3-neohesperidoside	C27H30O17	Flavonoids	625.139	625.14	-0.207953					607, 316, 271, 194, 178
18	0.69	1,2,6-Trigalloylglucose	C27H24O18	Tannins	635.09	635.088	0.204696					483, 465, 313, 295, 211, 169, 125
19	0.7	Isomaltulose	C12H22O11	Carbohydrates	341.108	341.108	-0.0879486					179,161,143,119,89,71,59
20	0.71	Gallic acid or isomer	C7H6O5	Carboxylic Acids	169.014	169.014	0					125, 124, 108, 79, 51
21	0.71	1,6-Digalloyl glucose or isomer	C20H20O14	Tannins	483.078	483.077	0.144904					331, 297, 223, 189, 171, 137, 125
22	0.72	Uridine-5'-diphosphogalactose disodium salt	C15H24N2O17P2	Nucleic acid derivatives	565.048	565.047	0.0530929					384, 323, 272, 241, 150, 78
23	0.76	Benzoic acid + 2O, O-Hex or isomer	C13H16O9	Phenolic acids	315.072	315.072	0.0952165					153, 152, 109, 108
24	0.76	PubChem CID 354445	C16H20O9	Carbohydrates				401.108				355, 203, 191, 180, 179
25	0.78	Trehalose	C12H22O11	Carbohydrates	341.109	341.108	0.146581					179, 149, 119, 113, 89, 71, 59
26	0.8	Gallic acid or isomer	C7H6O5	Carboxylic Acids	169.014	169.014	0.118334					125, 124, 108, 79, 51
27	0.95	Sissotrin or isomer	C22H22O10	Flavonoids	445.119	445.113	1.25811					283, 227, 225, 211, 151, 135
28	0.97	Citric acid or isomer	C6H8O7	Carboxylic Acids	191.02	191.019	0.209403					111, 87, 85, 58, 57
29	0.97	Oxiglutatione	C20H32N6O12S2	Amino acids and Peptides	611.146	611.144	0.245441					593, 482, 346, 338, 306, 272
30	0.98	Isoscopoletin	C10H8O4	Phenols	191.02	191.034	-7.7473					176, 163
31	0.99	12a-hydroxy-5-deoxydehydromunduserone	C19H18O6	Others	341.109	341.103	1.84695					281,179,161,89,59
32	1.02	Uridine	C9H12N2O6	Carbohydrates	243.062	243.062	0.205709					200, 182, 152, 140, 117, 111, 110
33	1.11	Carglumic acid or isomer	C6H10N2O5	Amino acids	189.04	189.051	-5.81853					189, 146, 129, 128, 59
34	1.12	Gallic acid or isomer	C7H6O5	Carboxylic Acids	169.014	169.014	0.236667					125, 124, 108, 79, 51
35	1.12	PubChem CID 72744980	C13H18O8	Carbohydrates				347.098				301, 140, 139, 124
36	1.21	Citric acid or isomer	C6H8O7	Carboxylic Acids	191.02	191.019	0.209403					111, 87, 85, 58, 57
37	1.22	2-hydroxyglutaric acid or isomer	C5H8O5	Carboxylic acids	147.03	147.029	0.204041					147, 103, 85, 84, 75, 73
38	1.22	5,6,2'-Trimethoxyflavone	C18H16O5	Flavonoids	311.095	311.098	-0.900039					293, 283, 230, 198, 197, 184, 183, 170
39	1.22	Juniperoside III	C15H20O7	Carbohydrates	311.098	311.113	-4.88568					312, 311, 149, 91
40	1.23	Maltitol	C12H24O11	Carbohydrates	343.124	343.124	0.058288					179, 161, 119, 101, 89, 88, 85, 71, 59
41	1.24	Glucogallin or isomer	C13H16O10	Tannins	331.067	331.067	0.120822					271, 241, 211, 169, 151, 125
42	1.27	Gallic acid or isomer	C7H6O5	Carboxylic Acids	169.014	169.014	0.1775					125, 124, 108, 79, 51
43	1.28	3,4-Di-O-galloylquinic acid	C21H20O14	Phenols	495.078	495.077	0.138265					343, 313, 191, 173, 169, 137, 125, 93
44	1.39	Succinic acid	C4H6O4	Carboxylic acids	117.019	117.019	0.0854564					99, 74, 73, 55, 54
45	1.39	Carglumic acid or isomer	C6H10N2O5	Amino acids	189.04	189.051	-5.76564					189, 146, 129, 128, 59
46	1.52	Glucogallin or isomer	C13H16O10	Tannins	331.067	331.067	0.0906162					271, 241, 211, 169, 151, 125
47	1.5709	PubChem CID 51136557	C18H17NO5	Others	326.095	326.103	-2.38069					222, 164, 163, 145, 120, 119
48	1.59	Glucogallin or isomer	C13H16O10	Tannins	331.067	331.067	0.120822					271, 241, 211, 169, 151, 125
49	1.76	Gallic acid or isomer	C7H6O5	Carboxylic Acids	169.014	169.014	0.236667					125, 124, 108, 79, 51
50	1.76	4-(3-Hydroxybutyl)phenyl beta-D-glucopyranoside	C16H24O7	Phenolic glycosides	327.144	327.144	-0.00560726					255, 239, 198, 197, 169, 87, 71
51	1.83	Glucogallin or isomer	C13H16O10	Tannins	331.067	331.067	0.0906162					271, 241, 211, 169, 151, 125
52	1.88	Carglumic acid or isomer	C6H10N2O5	Amino acids	189.04	189.051	-5.71274					189, 146, 129, 128, 59
53	1.95	Gallic acid or isomer	C7H6O5	Carboxylic Acids	169.014	169.014	0.295834					125, 124, 108, 79, 51
54	1.97	PubChem CID 5280653	C15H18O7	Carbohydrates	309.119	309.097	6.98809					[M+H] 149, 132, 131, 104, 103
55	2.02	Myricetin 3-galactoside	C21H20O13	Flavonoids	479.083	479.083	0.0834929					317, 316, 287, 271, 270, 259
56	2.11	Salipurposid or isomer	C21H22O10	Flavonoids	433.113	433.113	-0.138532					271, 227, 203, 177, 165, 151, 119
57	2.14	Ginnalin A	C20H20O13	Phenols	467.082	467.083	-0.171276					315, 169, 168, 152, 151
58	2.46	Polydatin	C20H22O8	Phenols				435.114				227, 185, 183, 159, 143
59	2.54	Glucogallin or isomer	C13H16O10	Tannins	331.067	331.067	0.0906162					271, 241, 211, 169, 151, 125
60	2.59	Carglumic acid or isomer	C6H10N2O5	Amino acids	189.04	189.051	-5.65985					189, 146, 129, 128, 59
61	2.65	2-hydroxyglutaric acid or isomer	C5H8O5	Carboxylic acids	147.03	147.029	0.204041					147, 103, 85, 84, 75, 73
62	2.7	Avicularin or isomer	C20H18O11	Flavonoids	433.076	433.077	-0.334484					301, 300, 271, 255, 187, 183, 151
63	2.73	Paeoniflorin or isomer	C23H28O11	Terpenoids	479.156	479.155	0.0417401					449, 327, 165, 121
64	2.77	2-hydroxyglutaric acid or isomer	C5H8O5	Carboxylic acids	147.03	147.029	0.204041					147, 103, 85, 84, 75, 73
65	2.78	Carglumic acid or isomer	C6H10N2O5	Amino acids	189.04	189.051	-5.65985					189, 146, 129, 128, 59
66	2.78	Curculigoside or isomer	C22H26O11	Carbohydrates				511.146				481, 479, 345, 269, 165, 153, 150, 109
67	2.82	Carglumic acid or isomer	C6H10N2O5	Amino acids	189.04	189.051	-5.76564					189, 146, 129, 128, 59
68	2.82	Glucogallin or isomer	C13H16O10	Tannins	331.067	331.067	0.0906162					271, 241, 211, 169, 151, 125
69	2.84	Benzoic acid + 2O, O-Hex or isomer	C13H16O9	Phenolic acids	315.072	315.072	0.158694					153, 152, 109, 108
70	2.85	Avicularin or isomer	C20H18O11	Flavonoids	433.077	433.077	-0.0692717					301, 300, 271, 255, 243, 151
71	2.93	Eriodictyol-7-O-glucoside	C21H22O11	Flavonoids	449.129	449.108	4.6314					287, 286, 285, 153, 152
72	2.95	Derrustone	C18H14O6	Flavonoids	325.056							339, 326, 325, 197, 185, 183, 91, 74
73	3.03	Okanin-4'-O-glucoside	C21H22O11	Flavonoids	449.129	449.108	4.65366					287, 269, 251, 151, 135, 125
74	3.15	Benzoic acid + 2O, O-Hex or isomer	C13H16O9	Phenolic acids	315.072	315.072	0.0634776					153, 152, 109, 108
75	3.15	Trigalloylglucose or isomer	C27H24O18	Tannins	635.089	635.088	0.094475					483, 465, 313, 295, 211, 169
76	3.18	PubChem CID 23874480	C22H32O6	Terpenoids				437.218				409, 391, 355, 333, 275
77	3.31	PubChem CID 51136479	C19H18O6	Others	341.087	341.103	-4.39751					143,113,101,89,85,71,59
78	3.32	1,6-Digalloyl glucose or isomer	C20H20O14	Tannins	483.077	483.077	-0.0414012					331, 297, 223, 189, 171, 137, 125
79	3.35	Glucogallin or isomer	C13H16O10	Tannins	331.067	331.067	0.0302054					271, 241, 211, 169, 151, 125
80	3.37	Gallic acid or isomer	C7H6O5	Carboxylic Acids	169.014	169.014	0.118334					125, 124, 108, 79, 51
81	3.38	PubChem CID 75528777	C26H38O10	Terpenoids				555.228				509, 465, 303, 161, 101
82	3.44	1,3,6-tri-O-galloylglucose or isomer	C27H24O18	Tannins	635.089	635.088	0.0394706					483, 465, 313, 295, 211, 169
83	3.55	Trigalloylglucose or isomer	C27H24O18	Tannins	635.09	635.088	0.173204					483, 465, 313, 295, 211, 169
84	3.64	1,3,6-tri-O-galloylglucose or isomer	C27H24O18	Tannins	635.089	635.088	0.110221					635, 465, 271, 169, 125
85	3.67	PubChem CID 6123144	C18H28O9	Lipids	387.129	387.165	-9.40167					387, 163, 119, 101
86	3.7	Benzoic acid + 2O, O-Hex or isomer	C13H16O9	Phenolic acids	315.072	315.072	0.190433					153, 152, 109, 108
87	3.71	2-hydroxyglutaric acid or isomer	C5H8O5	Carboxylic acids	147.03	147.03	-0.136027					147, 103, 85, 84, 75, 73
88	3.71	Carglumic acid or isomer	C6H10N2O5	Amino acids	189.04	189.051	-5.97722					189, 146, 129, 128, 59
89	3.72	cis-Piceid	C20H22O8	Phenols	389.145	389.124	5.39674					229, 228, 227, 185, 183, 143
90	3.74	Oxypaeoniflora or isomer	C23H28O12	Terpenoids	495.151	495.15	0.0403918					465, 281, 195, 165, 137
91	3.78	Glucogallin or isomer	C13H16O10	Tannins	331.066	331.067	-0.0906162					271, 241, 211, 169, 151, 125
92	3.79	Plantagoside or isomer	C21H22O12	Flavonoids	465.102	465.103	-0.193505					466, 303, 285, 151, 125
93	3.79	Dactylin or isomer	C28H32O17	Flavonoids	639.157	639.156	0.187748					519, 477, 476, 315, 313, 285
94	3.8	Methyl gallate or isomer	C8H8O5	Phenolic acids	183.03	183.029	0.27318					168, 140, 139, 124, 123, 111
95	3.82	PubChem CID 14635445 or isomer	C16H26O8	Terpenoids	345.155	345.155	0.0869175					184, 183, 165, 153, 80
96	3.82	Cyanin	C27H31O16+	Flavonoids	609.145	609.146	-0.0328329					447, 446, 285, 284, 255
97	3.84	Oxypaeoniflora or isomer	C23H28O12	Terpenoids	495.15	495.15	-0.0201959					465, 281, 195, 165, 137
98	3.85	PubChem CID 23843953 or isomer	C24H30O14	Terpenoids	541.156	541.156	-0.018479					195, 170, 169, 125, 101, 81
99	3.86	Syringin	C17H24O9	Phenolic glycosides				417.139				343, 254, 211, 194, 191, 176, 161
100	3.92	Isorhamnetin-3,7-diglucoside	C28H32O17	Flavonoids	639.157	639.156	0.172102					519, 477, 315
101	3.93	Gallic acid or isomer	C7H6O5	Carboxylic Acids	169.013	169.014	-0.118334					125, 124, 108, 79, 51
102	3.96	Methyl gallate or isomer	C8H8O5	Phenolic acids	183.03	183.029	0.27318					168, 140, 139, 124, 123, 111
103	3.97	1,6-Digalloyl glucose or isomer	C20H20O14	Tannins	483.077	483.077	-0.0621018					331, 297, 223, 189, 171, 137, 125
104	3.98	PubChem CID 131753120	C16H28O10	Carbohydrates				425.166				425, 380, 379, 149, 119
105	4	Spiraeoside or isomer	C21H20O12	Flavonoids	463.088	463.088	0.0215942					300, 255, 243, 229, 227, 143
106	4.01	aceroside VII	C25H34O8	Others	461.244	461.217	5.85148					355, 341, 301, 299, 191, 171, 150
107	4.02	Glucogallin or isomer	C13H16O10	Tannins	331.067	331.067	0.151027					271, 241, 211, 169, 151, 125
108	4.02	5,7-dihydroxy-3-[(2S,3R,4S,5R,6R)-3,4,5-trihydroxy-6-(hydroxymethyl)oxan-2-yl]oxy-2-(3,4,5-trihydroxyphenyl)chromen-4-one	C21H20O13	Flavonoids	479.081	479.083	-0.271352					317, 316, 287, 271, 270, 259
109	4.03	Carglumic acid or isomer	C6H10N2O5	Amino acids	189.04	189.051	-5.81853					189, 146, 129, 128, 59
110	4.04	PubChem CID 24871205 or isomer	C23H28O11	Terpenoids				525.161				449, 431, 327, 147, 121
111	4.07	Benzoic acid + 2O, O-Hex or isomer	C13H16O9	Phenolic acids	315.072	315.072	0.190433					153, 152, 109, 108
112	4.08	Flavonol base + 4O, 1MeO, O-Hex-Hex	C28H32O18	Flavonoids	655.152	655.151	0.122109					495, 493, 331, 330, 302, 301
113	4.11	Geniposidic acid or isomer	C16H22O10	Terpenoids	373.15	373.113	9.75574					327, 309, 165, 149, 137, 123
114	4.11	Rutin	C27H30O16	Flavonoids	609.145	609.146	-0.0820822					301, 300, 272, 271, 227, 191, 178, 169
115	4.14	Isosakuranin	C22H24O10	Flavonoids	447.15	447.129	4.67427					285, 227, 164
116	4.14	Olivil 4'-O-glucoside or isomer	C26H34O12	Lignan glycosides	537.197	537.197	0.0186151					535, 375, 327, 312, 283
117	4.18	Polygalatenoside A	C19H26O11	Carbohydrates	429.14	429.14	-0.0233024					249, 187, 179, 161, 159, 145
118	4.19	Dactylin or isomer	C28H32O17	Flavonoids	639.156	639.156	0.0469369					519, 477, 476, 315, 313, 285
119	4.23	Olivil 5'-O-glucoside or isomer	C26H34O12	Lignan glycosides	537.197	537.197	0.0558454					535, 375, 327, 312, 283
120	4.26	Methyl gallate or isomer	C8H8O5	Phenolic acids	183.029	183.029	0.0546361					177, 168, 140, 139, 127, 124, 111
121	4.26	Tanegoside (Not validated)	C26H34O12	Phenols				583.202				537, 375, 195, 179, 165
122	4.26	PubChem CID 24011673	C27H22O18	Tannins	633.072	633.073	-0.173756					463, 302, 300, 275, 273
123	4.26	1,3,6-tri-O-galloylglucose or isomer	C27H24O18	Tannins	635.089	635.088	0.110221					635, 465, 271, 169, 125
124	4.26	1,2,4,6-Tetragalloylglucose or isomer	C34H28O22	Tannins	787.101	787.099	0.177868					617, 465, 447, 295, 169
125	4.3	PubChem CID 57509323 or isomer	C26H36O12	Lignan glycosides	539.213	539.213	-0.0386465					491, 343, 195, 165, 161, 150
126	4.31	Guaijaverin or isomer	C20H18O11	Flavonoids	433.078	433.077	0.0847498					301, 300, 271, 255, 243, 227, 151
127	4.32	Geniposidic acid or isomer	C16H22O10	Terpenoids	373.15	373.113	9.78255					327, 309, 165, 149, 137, 123
128	4.32	Plantagoside or isomer	C21H22O12	Flavonoids	465.105	465.103	0.259571					466, 303, 285, 151, 125
129	4.34	Digoxigenin or isomer	C23H34O5	Terpenoids				435.223				449, 436, 425, 407, 389, 171, 129, 113
130	4.35	N-Acetyl-DL-tryptophan	C13H14N2O3	Amino acids	245.093	245.093	0.215602					203, 201, 159, 142, 116, 98, 74, 72, 58
131	4.36	Tetragalloylglucose or isomer	C34H28O22	Tannins	787.101	787.099	0.228688					617, 465, 447, 295, 169
132	4.38	Methyl gallate or isomer	C8H8O5	Phenolic acids	183.03	183.029	0.109272					177, 168, 140, 139, 127, 124, 111
133	4.39	Quercetin	C15H10O7	Flavonoids	301.057	301.035	7.40778					245, 189, 183, 178, 152, 150, 101
134	4.4	1,2,3,4,6-Pentagalloylglucose or isomer	C41H32O26	Tannins	939.111	939.11	0.106484					787, 635, 465, 275, 169
135	4.42	Guaijaverin or isomer	C20H18O11	Flavonoids	433.077	433.077	-0.0461811					301, 300, 271, 255, 243, 227, 151
136	4.42	PubChem CID 23843961	C25H34O8	Terpenoids				507.207				461, 417, 389, 329, 191
137	4.43	Kaempferol 3-gentiobioside	C27H30O16	Flavonoids	609.145	609.146	-0.0820822					327, 285, 284, 283, 255
138	4.43	1,3,6-tri-O-galloylglucose or isomer	C27H24O18	Tannins	635.089	635.088	0.0787292					635, 465, 271, 169, 125
139	4.47	Rhamnetin	C16H12O7	Flavonoids	315.072	315.05	6.95127					293,165,151,109,91
140	4.47	1,2,3,6-Tetragalloylglucose or isomer	C34H28O22	Tannins	787.101	787.099	0.228688					635, 617, 483, 465, 313
141	4.48	PubChem CID 23815371	C21H32O11	Lipids				505.192				459, 327, 293, 165, 161
142	4.49	PubChem CID 44715257	C14H21N3O4	Amino acids	294.135	294.145	-3.67165					221, 208, 178, 176, 158
143	4.51	Guaijaverin or isomer	C20H18O11	Flavonoids	433.077	433.077	-0.0230906					301, 300, 271, 255, 243, 227, 151
144	4.51	Olivil 6'-O-glucoside or isomer	C26H34O12	Lignan glycosides	537.197	537.197	0.0372303					535, 375, 327, 312, 283
145	4.53	PubChem CID 44715469	C25H28O12	Phenols	519.151	519.15	0.0789233					501, 307, 265, 211, 163, 145
146	4.54	Biliverdin	C33H34N4O6	Carboxylic acids	581.281	581.24	7.0883					583, 286, 285, 241, 240, 239, 164, 46
147	4.6	Praeroside II	C20H24O10	Others				469.136				423, 405, 261, 243, 169, 125
148	4.6	Quercetin 3-(6''-acetylglucoside)	C23H22O13	Flavonoids	505.099	505.098	0.257376					301, 300 [18]
149	4.62	4'-O-Galloylpaeoniflorin or isomer	C30H32O15	Terpenoids	631.167	631.166	0.0633747					631, 313, 209, 169
150	4.64	Isookaninglucoside	C21H22O11	Flavonoids	449.111	449.108	0.512126					313, 287, 269, 225, 193, 151, 135
151	4.64	Curculigoside or isomer	C22H26O11	Carbohydrates	465.139	465.14	-0.150492					343, 181, 121, 113, 59
152	4.65	Methyl digallate or isomer	C15H12O9	Phenolic acids	335.04	335.04	-0.0298472					183, 168, 124
153	4.65	Guaijaverin or isomer	C20H18O11	Flavonoids	433.077	433.077	-0.0230906					301, 300, 271, 255, 243, 227, 151
154	4.67	PubChem CID 57509323 or isomer	C26H36O12	Lignan glycosides	539.213	539.213	0					491, 343, 195, 165, 161, 150
155	4.69	1,2,3,4,6-Pentagalloylglucose or isomer	C41H32O26	Tannins	939.112	939.11	0.212968					787, 635, 465, 275, 169
156	4.7	PubChem CID 45783138	C19H22O6	Phenols	345.126	345.134	-2.23102					345, 223, 204, 179, 165
157	4.72	Paeonoside or isomer	C15H20O8	Phenolic glycosides	327.108	327.108	0.0917128					327, 309, 207, 165
158	4.72	PubChem CID 56776296 or isomer	C16H24O7	Carbohydrates	327.108	327.1	2.53745					165, 101, 85, 71, 59
159	4.72	Aucubin	C15H22O9	Terpenoids	345.118	345.119	-0.0289755					183, 119, 113, 89, 71
160	4.72	Deacetyl asperulosidic acid methyl ester	C17H24O11	Terpenoids	403.124	403.124	-0.0496125					339, 327, 195, 165, 139, 113, 101, 89
161	4.72	Albiflorin or isomer	C23H28O11	Terpenoids	479.155	479.155	0					357, 327, 195, 177, 165, 121
162	4.72	Oxypaeoniflora or isomer	C23H28O12	Terpenoids	495.15	495.15	-0.0201959					465, 281, 195, 165, 137
163	4.72	Scutellarioside II or isomer	C24H28O12	Phenols	507.15	507.15	-0.0788721					345, 307, 199, 181, 145, 119, 117, 97
164	4.72	Paeoniflorin or isomer	C23H28O11	Terpenoids	479.155	479.155	0.0208701	525.16				450, 449, 327, 165, 121, 77
165	4.75	Isoquercitin or isomer	C21H20O12	Flavonoids	463.087	463.088	-0.129565					301, 300, 283, 243, 151
166	4.75	PubChem CID 45359872 or isomer	C23H30O12	Phenolic acids	497.165	497.166	-0.261482					337, 183, 169, 125
167	4.79	Methyl digallate or isomer	C15H12O9	Phenolic acids	335.041	335.04	0.0895415					183, 168, 124
168	4.81	Rhamnetin 3-galactoside	C22H22O12	Flavonoids	477.102	477.103	-0.230558					315, 314, 313, 299, 169
169	4.84	PubChem CID 5319332 or isomer	C22H26O10	Terpenoids	449.144	449.145	-0.133587					149, 123, 122, 121, 101, 77
170	4.84	Albiflorin or isomer	C23H28O11	Terpenoids				525.161				495, 479, 446, 324, 286, 284, 198, 121
171	4.84	Tetragalloylglucose or isomer	C34H28O22	Tannins	787.101	787.099	0.215983					635, 617, 483, 465, 313
172	4.85	Pentagalloylglucose or isomer	C41H32O26	Tannins	939.112	939.11	0.181022					787, 635, 465, 275, 169
173	4.86	Geniposidic acid or isomer	C16H22O10	Terpenoids	373.15	373.113	9.67534					327, 309, 165, 149, 137, 123
174	4.88	Tetragalloylglucose or isomer	C34H28O22	Tannins	787.101	787.099	0.215983					635, 617, 483, 465, 313
175	4.9	PubChem CID 45359872 or isomer	C23H30O12	Phenolic acids	497.166	497.166	-0.020114					337, 183, 169, 125
176	4.91	PubChem CID 25225302	C26H34O11	Flavonoids	521.203	521.202	0.0504099					476, 341, 329, 277, 161
177	4.94	Digoxigenin or isomer	C23H34O5	Terpenoids				435.222				449, 436, 425, 407, 389, 171, 113
178	4.94	PubChem CID 23843970 or isomer	C26H34O11	Lignan glycosides				567.207				521, 519, 359, 329, 326, 323, 113
179	4.95	PubChem CID 24871205 or isomer	C23H28O11	Terpenoids	479.155	479.155	-0.142945					449, 357, 327, 165, 121
180	4.95	Pentagalloylglucose or isomer	C41H32O26	Tannins	939.112	939.11	0.181022					787, 635, 465, 275, 169
181	4.96	2'-O-galloylhyperin	C28H24O16	Flavonoids	615.1	615.099	0.162576					615, 313, 301, 178, 151
182	4.97	PubChem CID 23872043	C25H34O8	Terpenoids				507.207				461, 329, 313, 161, 153
183	4.99	Methyl gallate or isomer	C8H8O5	Phenolic acids	183.03	183.029	0.109272					177, 168, 140, 139, 127, 124, 111
184	4.99	Methyl digallate or isomer	C15H12O9	Phenolic acids	335.04	335.04	0					183, 168, 124
185	5.05	PubChem CID 51136555	C24H42O12	Terpenoids				567.265				521, 389, 233, 191, 186, 161, 113, 101
186	5.08	PubChem CID 23843970 or isomer	C26H34O11	Lignan glycosides				567.208				521, 519, 359, 329, 326, 323, 113
187	5.1	Quercetin 3,4'-diglucoside	C27H30O17	Flavonoids	625.139	625.14	-0.207953					600, 463, 301, 300, 179
188	5.12	Methyl gallate or isomer	C8H8O5	Phenolic acids	183.03	183.029	0.163908					177, 168, 140, 139, 127, 124, 111
189	5.12	Methyl digallate or isomer	C15H12O9	Phenolic acids	335.04	335.04	0					183, 168, 124
190	5.13	Kaempferol-7-neohesperidoside	C27H30O15	Flavonoids	593.151	593.151	0.0674365					595，594, 593, 447, 286, 283, 151
191	5.15	Paeoniflorin or isomer	C23H28O11	Terpenoids				525.161				450, 449, 327, 165, 121, 77
192	5.17	Pentagalloylglucose or isomer	C41H32O26	Tannins	939.112	939.11	0.181022					787, 635, 465, 275, 169
193	5.18	Isoquercitin or isomer	C21H20O12	Flavonoids	463.087	463.088	-0.172753					301, 300, 283, 243, 151
194	5.19	Luteolin 7-glucoside	C21H20O11	Flavonoids	447.092	447.093	-0.0671002					327, 285, 284
195	5.27	Galloylpaeoniflorin or isomer	C30H32O15	Terpenoids	631.167	631.166	0.0633747					631, 613, 509, 491, 479, 313, 271
196	5.32	Paeoniflorin or isomer	C23H28O11	Terpenoids	479.155	479.155	-0.0626102	525.161				450, 449, 327, 165, 121, 113, 107, 77
197	5.32	Pentagalloylglucose or isomer	C41H32O26	Tannins	939.112	939.11	0.181022					787, 635, 465, 275, 169
198	5.37	Kaempferol galloylglucoside	C28H24O15	Flavonoids	599.104	599.104	0					447, 313, 285, 284, 169, 151, 125
199	5.39	PubChem CID 23843953 or isomer	C24H30O14	Terpenoids	541.155	541.156	-0.0739159					195, 170, 169, 125, 101, 81
200	5.46	Galloylpaeoniflorin or isomer	C30H32O15	Terpenoids	631.167	631.166	0.110906					631, 613, 509, 491, 479, 313, 271
201	5.48	Naringenin	C15H12O5	Flavonoids	271.06	271.061	-0.220343					177, 176, 164, 151, 119, 107, 93, 83
202	5.49	Methyl gallate or isomer	C8H8O5	Phenolic acids	183.03	183.029	0.163908					177, 168, 140, 139, 127, 124, 111
203	5.49	Bilobalide	C15H18O8	Terpenoids	325.093	325.092	0.0922815					251, 237, 193, 165, 163
204	5.49	Prunin	C21H22O10	Flavonoids	433.112	433.113	-0.34633					313, 271, 227, 151, 125
205	5.5	Rhoifolin or isomer	C27H30O14	Flavonoids	577.156	577.156	0.051979					415, 413, 276, 271, 269, 268
206	5.5	Peonidin-3,5-O-di-beta-glucoside	C28H33O16+	Flavonoids					623.159			269, 268, 238, 223, 211, 199, 147
207	5.53	Methyl digallate or isomer	C15H12O9	Phenolic acids	335.04	335.04	0					183, 168, 124
208	5.55	PubChem CID 14055725 or isomer	C28H24O15	Flavonoids	599.104	599.104	0.0500748					447, 313, 285, 169, 151, 125
209	5.56	1,3,6-tri-O-galloylglucose or isomer	C27H24O18	Tannins	635.089	635.088	0.141713					635, 465, 271, 169, 125
210	5.57	Kaempferol 3-O-arabinoside or isomer	C20H18O10	Flavonoids	417.082	417.082	-0.0479522					285, 284, 255, 227, 183, 151
211	5.57	Hydrangeifolin I	C19H28O10	Carbohydrates				461.165				293, 188
212	5.58	PubChem CID 14635445 or isomer	C16H26O8	Terpenoids	345.155	345.155	-0.057945					184, 183, 165, 153, 80
213	5.58	Galloylpaeoniflorin or isomer	C30H32O15	Terpenoids	631.166	631.166	0.0158437					631, 613, 509, 491, 479, 313, 271
214	5.6	Neodiosmin	C28H32O15	Flavonoids	607.166	607.166	-0.01647					443, 301, 299, 284
215	5.6	Quercetin 3-(2-glucosylrhamnoside)	C27H30O16	Flavonoids	609.147	609.146	0.262663					447, 315, 313, 300, 271
216	5.63	pelargonidin-3-O-glucoside	C21H21O10+	Flavonoids					431.098			269, 268, 239, 224, 211
217	5.63	Astragalin	C21H20O11	Flavonoids	447.092	447.093	-0.156567					327, 285, 284, 255, 227, 182, 167, 151
218	5.64	Kaempferol 4-O-arabinoside or isomer	C20H18O10	Flavonoids	417.082	417.082	-0.0479522					285, 284, 255, 227, 183, 151
219	5.64	Mearnsitrin	C22H22O12	Flavonoids	477.103	477.103	-0.0838393					462, 315, 314, 300, 287, 271, 243
220	5.66	Kaempferol 5-O-arabinoside or isomer	C20H18O10	Flavonoids	417.082	417.082	-0.0479522					285, 284, 255, 227, 183, 151
221	5.71	Phosphatidylethanolamine 18:1-18:2	C41H76NO8P	Lipids	740.494	740.523	-3.90265					478, 282, 281, 280, 279
222	5.75	Chrysoeriol-7-O-glucoside	C22H22O11	Flavonoids	461.108	461.108	-0.0650606					[M+H]463, 303, 302, 301
223	5.78	Dactylin or isomer	C28H32O17	Flavonoids	639.157	639.156	0.0938738					519, 477, 476, 315, 313, 285
224	5.81	PubChem CID 45359872 or isomer	C23H30O12	Phenolic acids	497.165	497.166	-0.10057					337, 183, 169, 125
225	5.83	PubChem CID 14055725 or isomer	C28H24O15	Flavonoids	599.105	599.104	0.133533					447, 313, 285, 169, 151, 125
226	5.86	PubChem CID 45783027	C19H28O13	Carbohydrates				509.164				293, 233, 169, 154, 139
227	5.87	Olivil 7'-O-glucoside or isomer	C26H34O12	Lignan glycosides	537.197	537.197	-0.130306					535, 375, 327, 312, 283
228	5.95	Peonidin-3-O-glucoside	C22H23O11+	Flavonoids					461.109			299, 298, 285, 284, 255
229	5.99	Methyl digallate or isomer	C15H12O9	Phenolic acids	335.04	335.04	0					183, 168, 124
230	6.02	Dactylin or isomer	C28H32O17	Flavonoids	639.156	639.156	0.0156456					519, 477, 476, 315, 313, 285
231	6.06	1,3,6-tri-O-galloylglucose or isomer	C27H24O18	Tannins	635.089	635.088	0.125967					635, 465, 271, 169, 125
232	6.07	Geniposidic acid or isomer	C16H22O10	Terpenoids	373.149	373.113	9.64854					327, 309, 165, 149, 137, 123
233	6.07	PubChem CID 51136356	C21H32O10	Terpenoids				444.196				323, 305, 295, 281, 237
234	6.09	Methyl digallate or isomer	C15H12O9	Phenolic acids	335.04	335.04	-0.0298472					183, 168, 124
235	6.17	Geniposidic acid or isomer	C16H22O10	Terpenoids	373.15	373.113	9.72894					327, 309, 165, 149, 137, 123
236	6.19	PubChem CID 57503920	C16H28O7	Lipids	331.175	331.175	-0.211368					113, 101, 89, 71, 59
237	6.3	1,3,6-tri-O-galloylglucose or isomer	C27H24O18	Tannins	635.087	635.088	-0.141713					635, 465, 271, 169, 125
238	6.33	Olivil 8'-O-glucoside or isomer	C26H34O12	Lignan glycosides	537.197	537.197	-0.0186151					535, 375, 327, 312, 283
239	6.38	PubChem CID 56776283	C21H34O10	Terpenoids	445.207	445.207	-0.15723					293, 191, 179, 161, 143, 113, 85, 77
240	6.45	Olivil 9'-O-glucoside or isomer	C26H34O12	Lignan glycosides	537.197	537.197	0.0372303					535, 375, 327, 312, 283
241	6.48	Tiliroside	C30H26O13	Flavonoids	593.129	593.13	-0.0505792					447, 307, 285, 284, 240
242	6.52	Pentose-Hexose + C10H17 or isomer	C21H36O10	Terpenoids	447.223	447.223	-0.0894408					315, 161, 149, 101, 89, 85, 71
243	6.54	Tetragalloylglucose or isomer	C34H28O22	Tannins	787.101	787.099	0.165163					635, 617, 483, 465, 313
244	6.69	Pentose-Hexose + C10H18 or isomer	C21H36O10	Terpenoids	447.222	447.223	-0.156521					315, 161, 149, 101, 89, 85, 71
245	6.7	Luteolin	C15H10O6	Flavonoids	285.039	285.04	-0.175414					217, 215, 197, 175, 151, 133
246	6.7	PubChem CID 5319332 or isomer	C22H26O10	Terpenoids	449.145	449.145	0.0890581					149, 123, 122, 121, 101, 77
247	6.71	PubChem CID 24871205 or isomer	C23H28O11	Terpenoids	479.155	479.155	-0.0208701					449, 357, 327, 177, 169, 165, 121
248	6.71	Paeoniflorin or isomer	C23H28O11	Terpenoids				525.16				450, 449, 327, 165, 121, 77
249	6.72	Salidroside or isomer	C14H20O7	Phenols				345.118				179, 137, 119, 113, 101, 89, 71, 59
250	6.72	Delphinidin-3-O-glucoside	C21H21O12+	Flavonoids					463.087			301, 300, 299, 255, 125
251	6.72	Oxypaeoniflora or isomer	C23H28O12	Terpenoids	495.15	495.15	-0.0201959					465, 281, 195, 165, 137
252	6.72	Scutellarioside II or isomer	C24H28O12	Phenols	507.15	507.15	-0.0788721					345, 337, 331, 247, 181, 163, 119
253	6.73	Paeonoside or isomer	C15H20O8	Phenolic glycosides	327.108	327.108	0.152855					327, 309, 207, 165
254	6.73	PubChem CID 56776296 or isomer	C16H24O7	Carbohydrates	327.108	327.145	-11.1571					165, 101, 85, 71, 59
255	6.77	Pentose-Hexose + C10H19 or isomer	C21H36O10	Terpenoids	447.222	447.223	-0.201242					315, 161, 149, 101, 89, 85, 71
256	6.8	Sibiricose A5	C22H30O14	Carbohydrates	517.16	517.156	0.754125					337, 235, 193, 179, 175, 160
257	6.81	Sissotrin or isomer	C22H22O10	Flavonoids				491.119				445, 283, 268, 195, 167, 151, 132
258	6.82	Methyl digallate or isomer	C15H12O9	Phenolic acids	335.04	335.04	-0.0298472					183, 168, 124
259	6.84	Hyperoside	C21H20O12	Flavonoids	463.087	463.088	-0.129565					343, 301, 300, 273, 272, 151
260	6.96	Tetragalloylglucose or isomer	C34H28O22	Tannins	787.101	787.099	0.266802					635, 617, 483, 465, 313
261	7.09	Benzoylpaeoniflorin or isomer	C30H32O12	Terpenoids	583.18	583.182	-0.22344	629.186				465, 333, 327, 165, 121, 77
262	7.09	Benzoylpaeoniflorin or isomer	C30H32O12	Terpenoids	629.187							583, 465, 333, 327, 165, 121, 77
263	7.1	Pectolinarin	C29H34O15	Flavonoids	621.156	621.182	-4.12118					621, 470, 469, 313, 285, 205
264	7.11	Tetragalloylglucose or isomer	C34H28O22	Tannins	787.101	787.099	0.152459					635, 617, 483, 465, 313
265	7.12	PubChem CID 51136497	C26H30O12	Terpenoids	533.166	533.166	0					289, 235, 231, 195, 192, 191, 149, 85
266	7.15	Pentagalloylglucose or isomer	C41H32O26	Tannins	939.113	939.11	0.319451					787, 635, 465, 275, 169
267	7.2	Salipurposid or isomer	C21H22O10	Flavonoids	433.113	433.113	-0.138532					271, 227, 203, 177, 165, 151, 119
268	7.37	PubChem CID 10461109	C27H30O15	Flavonoids	593.15	593.151	-0.134873					593, 297, 285, 284, 283
269	7.38	Apigenin or isomer	C15H10O5	Flavonoids	269.044	269.045	-0.223011					227, 225, 151, 149, 107
270	7.39	Spiraeoside or isomer	C21H20O12	Flavonoids	463.088	463.088	0.0647825					300, 255, 243, 229, 227, 143
271	7.43	Luteolin 7-galactoside	C21H20O11	Flavonoids				895.194				447, 327, 285, 284, 239
272	7.44	Dictamnoside A or isomer	C21H36O9	Carbohydrates	431.228	431.228	0.0351012					269, 153, 71
273	7.44	Pentagalloylglucose or isomer	C41H32O26	Tannins	939.112	939.11	0.127781					787, 635, 465, 275, 169
274	7.45	Luteolin 4'-O-glucoside	C21H20O11	Flavonoids	447.092	447.093	-0.246034					287, 286, 285, 239, 217
275	7.54	4'-O-Galloylpaeoniflorin or isomer	C30H32O15	Terpenoids	631.167	631.166	0.0950621					631, 313, 209, 169
276	7.56	Cantharidin	C10H12O4	Terpenoids	195.066	195.066	0					177, 153, 151, 148, 138, 137, 123, 109
277	7.58	Kaempferol 6-O-arabinoside or isomer	C20H18O10	Flavonoids	417.082	417.082	-0.0479522					285, 284, 255, 227, 183, 151
278	7.59	Methyl gallate or isomer	C8H8O5	Phenolic acids	183.029	183.029	0					177, 168, 140, 139, 127, 124, 111
279	7.59	Mudanoside A	C14H18O9	Terpenoids	329.066	329.087	-6.53322					167
280	7.72	Kaempferol 7-O-arabinoside or isomer	C20H18O10	Flavonoids	417.082	417.082	-0.0479522					285, 284, 255, 227, 183, 151
281	7.74	Kaempferol 3-O-(galloyl glucoside) or isomer	C28H24O15	Flavonoids	599.103	599.104	-0.166916					447, 285
282	7.77	Malyngic acid	C18H32O5	Lipids	327.218	327.217	0.213925					291, 239, 229, 211, 171
283	7.88	Rhoifolin or isomer	C27H30O14	Flavonoids	577.155	577.156	-0.173263					415, 413, 276, 271, 269, 268
284	7.95	9,12,13-Trihydroxyoctadec-10-enoic acid	C18H34O5	Carboxylic Acids	329.233	329.233	-0.0351421					311, 229, 211, 171
285	7.95	Kaempferol 3-O-(galloyl glucoside) or isomer	C28H24O15	Flavonoids	599.103	599.104	-0.166916					447, 285
286	8.06	Apigetrin or isomer	C21H20O10	Flavonoids	431.098	431.098	-0.0463932					269, 268, 239, 211, 183
287	8.06	Maritimein	C21H20O11	Flavonoids	447.092	447.093	-0.111834					285, 133
288	8.2	PubChem CID 14034234	C22H22O11	Tannins	461.109	461.108	0.151808					461, 313, 211, 169, 151
289	8.37	Epigallocatechin	C15H14O7	Flavonoids	305.08	305.066	4.64864					286, 272, 261, 221, 210, 179, 161, 128
290	8.68	Dipropyl phthalate	C14H18O4	Carboxylic Acids	249.113	249.113	0.284008					221, 205, 177, 161, 149, 97, 59
291	8.85	Asiatic acid or isomer	C30H48O5	Terpenoids	487.305	487.342	-7.71531					487, 486, 428, 409, 391
292	9.02	Asiatic acid or isomer	C30H48O5	Terpenoids	487.342	487.342	-0.102597					469, 409[14] 487, 423[15]
293	9.12	PubChem CID 56773932 or isomer	C18H30O4	Terpenoids	309.207	309.207	0.0646817					211, 185, 179, 171, 169, 146, 141
294	9.22	PubChem CID 56773932 or isomer	C18H30O4	Terpenoids	309.207	309.207	0.0646817					211, 185, 179, 171, 169, 146, 141
295	9.36	Pentose-Hexose + C10H20 or isomer	C21H36O10	Terpenoids	447.222	447.223	-0.134161					315, 161, 149, 101, 89, 85, 71
296	9.61	Pentose-Hexose + C10H21 or isomer	C21H36O10	Terpenoids	447.223	447.223	-0.111801					315, 161, 149, 101, 89, 85, 71
297	9.88	DGMG 18:3 or isomer	C33H56O14	Lipids	675.359	675.359	-0.0740347	721.364				416, 415, 398, 397, 277, 113
298	9.91	9-oxooctadeca-10,12-dienoic acid	C18H30O3	Lipids	293.212	293.212	-0.0341051					293, 275, 231, 171, 121
299	9.91	13-Hydroxy-6,9,11-octadecatrienoic acid	C18H30O3	Lipids	293.212	293.212	0.0682101					293, 275, 231, 221, 149
300	10.09	DGMG 18:3 or isomer	C33H56O14	Lipids				721.365				676, 675, 416, 415, 398, 397, 277, 113
301	10.31	13-Hydroxy-9,11-octadecadienoic acid	C18H32O3	Lipids	295.228	295.227	0.082806					277, 195
302	10.33	Kobusone	C14H22O2	Terpenoids	221.154	221.154	-0.0132409					206, 205, 189, 149, 137, 99
303	10.61	1-linoleoyl-sn-glycero-3-phosphoethanolamine or isomer	C23H44NO7P	Lipids	476.276	476.278	-0.27295					279, 214, 196
304	10.82	1-linoleoyl-sn-glycero-3-phosphoethanolamine or isomer	C23H44NO7P	Lipids	476.276	476.278	-0.293946					279, 214, 196
305	10.87	MGMG 18:3	C27H46O9	Lipids				559.312				513, 278, 277, 253, 235, 101, 59
306	11.03	Roccellic acid	C17H32O4	Lipids	299.201	299.222	-6.9509					299,283,266,74
307	11.07	PubChem CID 44715454 or isomer	C27H46O9	Lipids				559.313				513, 393, 278, 277, 253, 235, 161, 141
308	11.18	Octadecanoic acid or isomer	C18H36O2	Lipids	283.264	283.264	0.176514					265
309	11.25	LPE 16:0	C21H44NO7P	Lipids	452.277	452.278	-0.243213					256, 255, 214, 197, 156
310	11.92	Dictamnoside A or isomer	C21H36O9	Carbohydrates	431.218	431.228	-2.31896					269,153,71
311	13.17	DGMG 18:3 or isomer	C33H56O14	Lipids				721.365				676, 675, 416, 415, 398, 397, 277, 113
312	13.84	Thymol-beta-D-glucoside	C16H24O6	Terpenoids	311.169	311.149	6.17782					283, 239, 197, 183, 171, 72
313	13.98	Veratric acid	C9H10O4	Carboxylic Acids	181.05	181.05	-0.0552333					153, 157, 137, 123, 122, 121, 97
314	13.98	Lauryl sulphate	C12H26O4S	Lipids	265.148	265.147	0.17803					221, 179, 125, 137, 136, 96
315	14.29	PubChem CID 44715454 or isomer	C27H46O9	Lipids				559.313				513, 393, 278, 277, 246, 235, 161, 141
316	15.01	(3E,12E)-3,12-dimethyl-8-methylidene-6,18-dioxatricyclo[14.2.1.0,]nonadeca-3,12,16(19)-triene-7,17-dione	C20H24O4	Others	327.183	327.16	7.28749					311, 294, 237, 284, 235, 185, 131
317	15.15	Undecylbenzenesulphonic acid	C17H28O3S	Others	311.169	311.168	0.160685					198, 197, 183
318	16.17	Stearic acid	C18H36O2	Lipids	283.264	283.264	0					283, 265
319	16.27	Canrenone	C22H28O3	Lipids	339.199	339.196	1.00237					340, 339, 239, 225, 197, 184, 183, 119
320	16.52	Octadecanoic acid or isomer	C18H36O2	Lipids	283.264	283.264	0.176514					265
321	20.14	PI 34:1	C43H81O13P	Lipids	835.532	835.533	-0.143621					835, 553, 281, 255, 241
