# Supplementary material for: Integrated Metabolomics Approach Reveals the Dynamic Variations of Metabolites and Bioactivities in Paeonia ostii ‘Feng Dan’ Leaves during Development
Source: Int J Mol Sci. 2024 Jan 15;25(2):1059. doi: 10.3390/ijms25021059 (PMC10816844; doi:10.3390/ijms25021059)
Supplement: Supplementary file 1 [file ijms-25-01059-s001.zip › supplementary material 3.xlsx]

## Sheet: Sheet1
Table S3 Content of targeted metabolites（mg/100g dw）of P. ostii ‘Feng Dan’ leaves at different stages.
Compounds	Y-1	Y-2	Y-3	Y-4	Y-5	Y-6	Y-7	Y-8	Y-9	Y-10	Y-11	Y-12	Y-13	Y-14	Y-15	Y-16	Y-17
Gallic acid	41.68 ± 0.94a	39.15 ± 2.91ab	40.97 ± 0.51a	36.35 ± 5.04b	30.66 ± 0.58c	25.96 ± 2.89d	19.53 ± 0.44hi	17.64 ± 1.52i	21.39 ± 0.67ghi	20.35 ± 1.52ghi	24.17 ± 1.65defg	24.08 ± 0.06defg	25.1 ± 2.58de	20.54 ± 0.21ghi	23.95 ± 1.8defg	24.33 ± 0.52def	23.21 ± 1.18defgh
Rutin	0.07 ± 0.01g	0.17 ± 0.01cd	0.23 ± 0.03b	0.19 ± 0.01bc	0.31 ± 0.08a	0.1 ± 0.02efg	0.16 ± 0.03cd	0.1 ± 0.02efg	0.12 ± 0.02def	0.13 ± 0.02de	0.1 ± 0efg	0.1 ± 0efg	0.09 ± 0.01efg	0.09 ± 0.02efg	0.08 ± 0fg	0.09 ± 0efg	0.07 ± 0.01g
Quercetin	1.04 ± 0.01a	0.55 ± 0.07c	0.6 ± 0.03b	0.2 ± 0.02d	0.16 ± 0de	0.15 ± 0.01e	0.17 ± 0.01de	0.16 ± 0.01e	0.15 ± 0.01e	0.16 ± 0.01de	0.16 ± 0.00e	0.16 ± 0.01de	0.15 ± 0.00e	0.16 ± 0.00de	0.16 ± 0.01de	0.16 ± 0.00e	0.16 ± 0.01e
Methyl gallate	0.83 ± 0.17e	0.9 ± 0.12e	4.74 ± 0.17cd	5.44 ± 0.09a	4.61 ± 0.14d	5.04 ± 0.27bc	5.02 ± 0.31bc	5.06 ± 0.17b	5.51 ± 0.10a	5.64 ± 0.11a	5.6 ± 0.07a	5.65 ± 0.07a	5.69 ± 0.02a	5.72 ± 0.07a	5.51 ± 0.13a	5.56 ± 0.09a	5.61 ± 0.06a
Paeoniflorin	1283 ± 25.82b	1318.45 ± 26.11ab	1317 ± 20.14ab	1359.17 ± 30.4a	1213.02 ± 44.03c	1161.9 ± 28.4cd	1084.19 ± 41.04ef	1136.9 ± 39.22de	1022.09 ± 26.03f	1034.93 ± 4.73f	929.8 ± 7.52g	905.65 ± 52.6gh	867.38 ± 14.86gh	839.77 ± 38.71hi	848.5 ± 51.09hi	850.4 ± 24.99hi	793.14 ± 40.42i
Hyperoside	3.3 ± 0.23h	4.49 ± 0.37fgh	8.1 ± 0.91cde	6.49 ± 0.69efg	3.9 ± 0.72gh	3.25 ± 0.43h	4.78 ± 1.34fgh	3.88 ± 0.33gh	6.43 ± 1.95efg	5.73 ± 0.75efgh	7.01 ± 0.51def	8.38 ± 2.15cde	9.73 ± 1.52bcd	11.36 ± 2.66b	10.67 ± 2.32bc	14.67 ± 1.79a	14.61 ± 1.9a
Benzoic acid	55.98 ± 4.11a	40.69 ± 5.19b	29.51 ± 6.68c	10.04 ± 4.64d	9.07 ± 1.58de	6.35 ± 6.02de	2.31 ± 1.16de	6.05 ± 5.6de	6.29 ± 5.66de	8.34 ± 0.92de	2.15 ± 0.56e	3.48 ± 0.8de	5.05 ± 0.54de	4.25 ± 1.05de	6.24 ± 5.02de	6.74 ± 1.5de	4.28 ± 1.03de
Luteolin	4.25 ± 0.15b	3.24 ± 0.59c	8.15 ± 0.15a	2.15 ± 0.57d	0.87 ± 0.06fg	0.77 ± 0.38fg	1.05 ± 0.61ef	0.49 ± 0.21fg	0.44 ± 0.09fg	0.54 ± 0.16fg	0.62 ± 0.12fg	0.58 ± 0.14fg	0.33 ± 0.09g	0.96 ± 0.47fg	0.86 ± 0.34fg	1.13 ± 0.4ef	1.74 ± 0.36de
Apigenin	0.86 ± 0.06b	0.58 ± 0.21c	1.66 ± 0.06a	0.2 ± 0.09ef	0.09 ± 0.01ef	0.11 ± 0.09ef	0.12 ± 0.1ef	0.06 ± 0.03f	0.06 ± 0.01f	0.07 ± 0.02ef	0.08 ± 0.01ef	0.09 ± 0.02ef	0.04 ± 0.02f	0.15 ± 0.05ef	0.18 ± 0.10ef	0.24 ± 0.13de	0.40 ± 0.08d
Isorhamnetin	1.82 ± 0.06a	0.35 ± 0.06b	0.36 ± 0.08b	0.10 ± 0.01c	0.10 ± 0.00c	0.09 ± 0.00c	0.13 ± 0.03c	0.09 ± 0.01c	0.09 ± 0.00c	0.10 ± 0.01c	0.10 ± 0.01c	0.10 ± 0.01c	0.09 ± 0.01c	0.11 ± 0.01c	0.12 ± 0.02c	0.10 ± 0.00c	0.10 ± 0.01c
Oxypaeoniflorin	74.45 ± 0.67a	59.51 ± 1.32b	54.07 ± 0.68bc	51.63 ± 1.71c	36.04 ± 0.41ef	44.44 ± 2.58d	38.57 ± 5.31de	41.04 ± 4.86de	42.9 ± 7.51d	38.04 ± 2.29de	29.57 ± 1.39fg	30.08 ± 4.48fg	28.4 ± 1.31g	24.4 ± 0.97g	27.77 ± 3.19g	26.79 ± 1.73g	23.89 ± 4.11g
Naringin	3.95 ± 0.17bcde	3.87 ± 0.19cde	7.96 ± 0.64a	7.73 ± 0.33a	4.16 ± 1.11bc	4.03 ± 1.21bcd	3.64 ± 0.49cdef	5.17 ± 1.44b	4.45 ± 0.63bc	3.86 ± 0.3cde	4.23 ± 0.42bc	3.88 ± 0.06bcde	3.2 ± 0.31cdef	3.25 ± 0.53cdef	2.74 ± 0.19ef	2.37 ± 0.23f	2.8 ± 0.22def
Astragalin	1.79 ± 0.48a	2.16 ± 0.14a	1.79 ± 0.67a	1.31 ± 0.02b	0.21 ± 0.25c	0.28 ± 0.17c	0.23 ± 0.2c	0.18 ± 0.13c	0.12 ± 0.13c	0.2 ± 0.05c	0.2 ± 0.05c	0.16 ± 0.06c	0.21 ± 0.11c	0.33 ± 0.17c	0.21 ± 0.04c	0.48 ± 0.04c	0.54 ± 0.03c
Prunin	2.15 ± 0.12b	1.87 ± 0.02c	2.4 ± 0.10a	2.22 ± 0.11ab	1.2 ± 0.06d	0.99 ± 0.06de	0.72 ± 0.08fgh	0.68 ± 0.06fgh	0.63 ± 0.09h	0.67 ± 0.11gh	0.68 ± 0.09gh	0.8 ± 0.11efgh	0.78 ± 0.03efgh	0.89 ± 0.15efg	0.9 ± 0.2ef	1.13 ± 0.19d	1.2 ± 0.03d
Apigetrin 7-glucoside	15.06 ± 0.33bcd	15.34 ± 0.19b	19.74 ± 0.74a	20.04 ± 0.61a	18.7 ± 0.32a	18.54 ± 1.19a	15.1 ± 0.79bc	15.47 ± 1.35b	13.18 ± 0.36ef	14.11 ± 1.11bcdef	12.65 ± 0.7f	13.51 ± 0.48def	13.73 ± 0.57cdef	14.45 ± 0.66bcde	14.37 ± 1.31bcde	14.42 ± 0.44bcde	15.25 ± 0.45bc
Kaempferol	0.59 ± 0.07a	0.21 ± 0.03b	0.23 ± 0.05b	0.04 ± 0c	0.04 ± 0.01c	0.03 ± 0.00c	0.05 ± 0.00c	0.03 ± 0.00c	0.03 ± 0.00c	0.03 ± 0.01c	0.03 ± 0.00c	0.04 ± 0.02c	0.03 ± 0.00c	0.03 ± 0.00c	0.03 ± 0.01c	0.03 ± 0.00c	0.03 ± 0.00c
Albiflorin	2211.00 ± 90.22cd	2249.23 ± 65.93bc	2447.17 ± 109.84b	2669.33 ± 49a	2413.42 ± 53.54b	2291.24 ± 226.74bc	2098.81 ± 153.73cde	2195.58 ± 72.81cde	2033.22 ± 81.51de	1997.25 ± 54.78ef	1783.55 ± 82.06g	1801.46 ± 69.73fg	1675.63 ± 46.77gh	1625.47 ± 110.74gh	1620.85 ± 89.86gh	1675.73 ± 10.03gh	1507.18 ± 69.93h
Benzoylpaeoniflorin	108.2 ± 3.75a	70.59 ± 4.24b	68.42 ± 10.06b	47.24 ± 1.59cd	33 ± 4.43d	34.13 ± 10.02d	33.39 ± 4.4d	46.79 ± 5.01cd	60.79 ± 13.7bc	36.01 ± 9.5d	69.46 ± 25.64b	70.41 ± 9.5b	71.47 ± 14.42b	62.97 ± 7.31bc	64.32 ± 1.85bc	45.76 ± 5.45cd	72.76 ± 13.73b
Ethyl gallate	0.2 ± 0.00b	0.19 ± 0.00b	0.35 ± 0.15a	0.19 ± 0.00b	0.19 ± 0.01b	0.19 ± 0.00b	0.19 ± 0.00b	0.19 ± 0.01b	0.20 ± 0.02b	0.20 ± 0.02b	0.19 ± 0.01b	0.19 ± 0.02b	0.20 ± 0.02b	0.19 ± 0.00b	0.19 ± 0.00b	0.19 ± 0.01b	0.19 ± 0.00b
PGG	590.34 ± 63.59a	546.62 ± 79.77ab	511.35 ± 26.81b	361.55 ± 31.6c	258.88 ± 6.99de	306.57 ± 65.67cd	206.35 ± 14.74ef	176.11 ± 70.75fg	103.47 ± 20.23gh	96.52 ± 12.51h	73.77 ± 14.04h	77.33 ± 13.02h	70.86 ± 4.37h	75.7 ± 8.77h	89.3 ± 7.82h	100.51 ± 28.2gh	97.69 ± 17.06h
Luteolin 7-glucoside	379.77 ± 4.83b	385.65 ± 19.73b	451.05 ± 3.42a	431.3 ± 9.11a	377.26 ± 5.97b	357.87 ± 27.37bc	347.41 ± 9.25cd	318.88 ± 6.85def	331.61 ± 12.88cde	322.82 ± 14.09def	335.38 ± 13.44cde	315.09 ± 26.16ef	311.75 ± 3.47ef	317.27 ± 20.55e	297.06 ± 13.14f	266.89 ± 11.33g	295.75 ± 5.37fg
(+)-Catechin	2.78±0.19a	2.04±0.14b	1.32±0.13c	0.68±0.11d	0.32±0.01ef	0.28±0.05efg	0.25±0.04efg	0.23±0.05ef	0.4±0.15e	0.1±0.09g	0.24±0.07efg	0.2±0.15efg	0.22±0.03efg	0.17±0.07fg	0.21±0.09e	0.15±0.07fg	0.25±0.1e
TMC	4780.33	4743.81	4975.84	5012.9	4405.9	4262.06	3861.93	3970.55	3653.17	3585.71	3279.49	3261.21	3089.91	3008.06	3014.01	3037.7	2860.59
TMC, total metabolite content. Data are presented as mean ± SD (n = 3). Different superscript letters in each row indicate significant differences (P < 0.05).
