# Supplementary material for: Integrated Metabolomics Approach Reveals the Dynamic Variations of Metabolites and Bioactivities in Paeonia ostii ‘Feng Dan’ Leaves during Development
Source: Int J Mol Sci. 2024 Jan 15;25(2):1059. doi: 10.3390/ijms25021059 (PMC10816844; doi:10.3390/ijms25021059)
Supplement: Supplementary file 1 [file ijms-25-01059-s001.zip › supplementary material 4.xlsx]

## Sheet: Sheet1
Data1	Data2	rho	pvalue	relation
ABTS	TPC	0.620587	0.00785639	positive
ABTS	Isorhamnetin	0.375067	0.137959	positive
ABTS	Benzoylpaeoniflorin	0.340174	0.18155	positive
ABTS	Kaempferol	0.33726	0.18556	positive
ABTS	Quercetin	0.28353	0.270112	positive
ABTS	Benzoic acid	0.275913	0.283742	positive
ABTS	(+)-catechin	0.264465	0.305	positive
ABTS	Oxypaeoniflora	0.0169375	0.948556	positive
ABTS	Pentagalloylglucose	0.00526418	0.984002	positive
DPPH	TPC	0.633868	0.00628889	positive
DPPH	Benzoylpaeoniflorin	0.389853	0.121881	positive
DPPH	Isorhamnetin	0.207909	0.42328	positive
DPPH	Kaempferol	0.166908	0.521994	positive
DPPH	Quercetin	0.121505	0.642258	positive
DPPH	(+)-catechin	0.107772	0.680552	positive
DPPH	Benzoic acid	0.0841187	0.748224	positive
FRAP	(+)-catechin	0.749374	0.00053461	positive
FRAP	Kaempferol	0.734731	0.000781013	positive
FRAP	Benzoic acid	0.73211	0.000833745	positive
FRAP	Quercetin	0.72942	0.000890882	positive
FRAP	Isorhamnetin	0.693965	0.00199976	positive
FRAP	Benzoylpaeoniflorin	0.617403	0.00827501	positive
FRAP	Pentagalloylglucose	0.510234	0.0363837	positive
FRAP	Oxypaeoniflora	0.504159	0.0390556	positive
FRAP	Astragalin	0.500058	0.0409418	positive
FRAP	Gallic acid	0.465751	0.0595381	positive
FRAP	Apigenin	0.35278	0.164865	positive
FRAP	Luteolin	0.321933	0.20762	positive
FRAP	Prunin	0.254138	0.324963	positive
FRAP	TMC	0.222601	0.39048	positive
FRAP	TFC	0.21713	0.402529	positive
FRAP	Paeoniflorin	0.213291	0.4111	positive
FRAP	TPC	0.156198	0.549401	positive
FRAP	Luteolin 7-glucoside	0.142941	0.584177	positive
FRAP	Ethyl gallate	0.028388	0.913875	positive
ORAC	Quercetin	0.656813	0.00417861	positive
ORAC	Benzoic acid	0.648535	0.00486077	positive
ORAC	(+)-catechin	0.64534	0.005147	positive
ORAC	Kaempferol	0.624667	0.00734479	positive
ORAC	Isorhamnetin	0.544273	0.0238968	positive
ORAC	Astragalin	0.520876	0.0320416	positive
ORAC	Pentagalloylglucose	0.490455	0.0456283	positive
ORAC	Oxypaeoniflora	0.479427	0.0514967	positive
ORAC	Gallic acid	0.468842	0.0576441	positive
ORAC	Benzoylpaeoniflorin	0.459988	0.063192	positive
ORAC	Luteolin	0.448411	0.0710303	positive
ORAC	Apigenin	0.441756	0.0758464	positive
ORAC	Prunin	0.329553	0.19645	positive
ORAC	Luteolin 7-glucoside	0.312836	0.221486	positive
ORAC	TMC	0.305149	0.233654	positive
ORAC	Paeoniflorin	0.297458	0.246246	positive
ORAC	TFC	0.271452	0.291916	positive
ORAC	Ethyl gallate	0.259432	0.314635	positive
ORAC	Albiflorin	0.117346	0.65377	positive
ORAC	Rutin	0.078538	0.764469	positive
ORAC	TPC	0.0661709	0.800791	positive
ORAC	Naringin	0.0295304	0.910422	positive
E. coli	(+)-catechin	0.664266	0.00363287	negtive
E. coli	Benzoic acid	0.657806	0.0041023	negtive
E. coli	Quercetin	0.651442	0.00461174	negtive
E. coli	Oxypaeoniflora	0.62599	0.00718474	negtive
E. coli	Kaempferol	0.599304	0.0110063	negtive
E. coli	Luteolin 7-glucoside	0.594534	0.0118336	negtive
E. coli	Astragalin	0.586149	0.013407	negtive
E. coli	Pentagalloylglucose	0.574525	0.0158563	negtive
E. coli	Gallic acid	0.564486	0.0182433	negtive
E. coli	Paeoniflorin	0.553362	0.0212075	negtive
E. coli	TMC	0.546956	0.0230769	negtive
E. coli	Luteolin	0.542933	0.0243147	negtive
E. coli	Apigenin	0.501831	0.0401181	negtive
E. coli	Isorhamnetin	0.491287	0.045207	negtive
E. coli	Prunin	0.45783	0.064602	negtive
E. coli	Benzoylpaeoniflorin	0.448862	0.070712	negtive
E. coli	Naringin	0.435712	0.0804228	negtive
E. coli	Ethyl gallate	0.423018	0.0906838	negtive
E. coli	Albiflorin	0.412667	0.0997231	negtive
E. coli	TFC	0.358237	0.157973	negtive
E. coli	Rutin	0.342927	0.177814	negtive
E. coli	TPC	0.312327	0.222278	positive
E. coli	Apigetrin 7-glucoside	0.0515454	0.844243	negtive
P. vulgaris	TPC	0.353947	0.163374	negtive
P. vulgaris	Methyl gallate	0.245852	0.341516	negtive
P. vulgaris	Hyperoside	0.13292	0.611057	negtive
S. typhimurium	Gallic acid	0.247472	0.338243	negtive
S. typhimurium	Prunin	0.230351	0.373752	negtive
S. typhimurium	Astragalin	0.183148	0.481678	negtive
S. typhimurium	Luteolin	0.17999	0.489396	negtive
S. typhimurium	Apigetrin 7-glucoside	0.161729	0.535168	negtive
S. typhimurium	Apigenin	0.157591	0.545799	negtive
S. typhimurium	Hyperoside	0.150943	0.563076	negtive
S. typhimurium	Pentagalloylglucose	0.146852	0.573824	negtive
S. typhimurium	Rutin	0.138269	0.596648	negtive
S. typhimurium	Luteolin 7-glucoside	0.137501	0.598709	negtive
S. typhimurium	Quercetin	0.117688	0.65282	negtive
S. typhimurium	Kaempferol	0.113528	0.664404	negtive
S. typhimurium	Isorhamnetin	0.0948565	0.717254	negtive
S. typhimurium	(+)-catechin	0.083306	0.750584	negtive
S. typhimurium	Benzoic acid	0.0799262	0.760419	negtive
S. typhimurium	TPC	0.0761416	0.771473	negtive
S. typhimurium	TFC	0.07073	0.787351	negtive
S. typhimurium	Ethyl gallate	0.0307703	0.906676	negtive
S. typhimurium	TMC	0.00651893	0.98019	negtive
S. aureus	TPC	0.680669	0.00263383	negtive
S. aureus	Benzoylpaeoniflorin	0.165638	0.525209	negtive
S. aureus	Isorhamnetin	0.151151	0.562533	negtive
S. aureus	Kaempferol	0.047213	0.857203	negtive
S. hemolytis-β	Paeoniflorin	0.476973	0.0528762	negtive
S. hemolytis-β	Albiflorin	0.466837	0.0588672	negtive
S. hemolytis-β	TMC	0.458246	0.0643286	negtive
S. hemolytis-β	Luteolin 7-glucoside	0.421648	0.0918448	negtive
S. hemolytis-β	Oxypaeoniflora	0.419558	0.0936369	negtive
S. hemolytis-β	TPC	0.381526	0.130765	positive
S. hemolytis-β	Pentagalloylglucose	0.367925	0.146226	negtive
S. hemolytis-β	Apigetrin 7-glucoside	0.361408	0.15406	negtive
S. hemolytis-β	Naringin	0.288652	0.261175	negtive
S. hemolytis-β	Rutin	0.23353	0.367008	negtive
S. hemolytis-β	Gallic acid	0.219114	0.398137	negtive
S. hemolytis-β	(+)-catechin	0.208733	0.421403	negtive
S. hemolytis-β	Benzoic acid	0.1869	0.472586	negtive
S. hemolytis-β	Quercetin	0.155773	0.550501	negtive
S. hemolytis-β	Astragalin	0.152873	0.558036	negtive
S. hemolytis-β	Prunin	0.150303	0.564751	negtive
S. hemolytis-β	Kaempferol	0.14158	0.587798	negtive
S. hemolytis-β	TFC	0.140572	0.590487	negtive
S. hemolytis-β	Luteolin	0.138755	0.595345	negtive
S. hemolytis-β	Isorhamnetin	0.11503	0.660214	negtive
S. hemolytis-β	Apigenin	0.111123	0.671134	negtive
S. hemolytis-β	Ethyl gallate	0.110192	0.673746	negtive
L. monocytogenes	Benzoylpaeoniflorin	0.736965	0.000738273	negtive
L. monocytogenes	TFC	0.529343	0.0288804	negtive
L. monocytogenes	Quercetin	0.441995	0.075669	negtive
L. monocytogenes	(+)-catechin	0.436565	0.0797656	negtive
L. monocytogenes	Kaempferol	0.435777	0.0803729	negtive
L. monocytogenes	Isorhamnetin	0.426616	0.087685	negtive
L. monocytogenes	Astragalin	0.420698	0.0926562	negtive
L. monocytogenes	Hyperoside	0.396078	0.115522	negtive
L. monocytogenes	Apigenin	0.36112	0.154413	negtive
L. monocytogenes	Prunin	0.36041	0.155284	negtive
L. monocytogenes	Benzoic acid	0.357866	0.158435	negtive
L. monocytogenes	Gallic acid	0.354512	0.162656	negtive
L. monocytogenes	Luteolin	0.353012	0.164567	negtive
L. monocytogenes	TPC	0.185438	0.476119	negtive
L. monocytogenes	Pentagalloylglucose	0.168545	0.517861	negtive
L. monocytogenes	Oxypaeoniflora	0.152649	0.55862	negtive
L. monocytogenes	Ethyl gallate	0.108077	0.679693	negtive
L. monocytogenes	Luteolin 7-glucoside	0.0446586	0.86486	negtive
